# Supplementary material for: Seven Epidemic Waves of COVID-19 in a Hospital in Madrid: Analysis of Severity and Associated Factors
Source: MDPI journal article supplement (doi:10.3390/v15091839), 2023-08-30
Supplement: s1 [file s1]

## Supplementary Materials:

**Table S1.** Study variables\*.

| Variable                      | Description                                                                                                                                                                                                                                                                                                                                                                                                                                                                                                    | Units (International System),<br>If Applicable |
|-------------------------------|----------------------------------------------------------------------------------------------------------------------------------------------------------------------------------------------------------------------------------------------------------------------------------------------------------------------------------------------------------------------------------------------------------------------------------------------------------------------------------------------------------------|------------------------------------------------|
| Admission date                | Date of first visit to the Emergency Department                                                                                                                                                                                                                                                                                                                                                                                                                                                                |                                                |
| Age                           | Patient's age at the time of admission                                                                                                                                                                                                                                                                                                                                                                                                                                                                         | years                                          |
| Sex                           | Male or Female                                                                                                                                                                                                                                                                                                                                                                                                                                                                                                 |                                                |
| Place of birth                | Caucasian, North African, Latin American                                                                                                                                                                                                                                                                                                                                                                                                                                                                       |                                                |
| Hypertension                  | Yes or not                                                                                                                                                                                                                                                                                                                                                                                                                                                                                                     |                                                |
| Diabetes                      | Yes or not                                                                                                                                                                                                                                                                                                                                                                                                                                                                                                     |                                                |
| Cardiopathy                   | Ischemic heart disease or heart failure, yes or not                                                                                                                                                                                                                                                                                                                                                                                                                                                            |                                                |
| COPD                          | chronic obstructive pulmonary disease, yes or not                                                                                                                                                                                                                                                                                                                                                                                                                                                              |                                                |
| Asthma                        | Yes or not                                                                                                                                                                                                                                                                                                                                                                                                                                                                                                     |                                                |
| Oncological disease           | Any oncological disease                                                                                                                                                                                                                                                                                                                                                                                                                                                                                        |                                                |
| HIV                           | human immunodeficiency virus infection, yes or not                                                                                                                                                                                                                                                                                                                                                                                                                                                             |                                                |
| Dementia                      | Yes or not                                                                                                                                                                                                                                                                                                                                                                                                                                                                                                     |                                                |
| Charlson                      | Charlson comorbidity index: predicts 10-year survival<br>in patients with multiple comorbidities.                                                                                                                                                                                                                                                                                                                                                                                                              |                                                |
| Type of vaccine               | Type of vaccine received against SARS-CoV-2<br>infection: BNT162b2 mRNA (Pfizer/BioNTech),<br>mRNA-1273 (Moderna), ChAdOx1 nCoV-<br>19/AZD1222 (AstraZeneca/Oxford), Ad26.COV2.S<br>(Janssen)                                                                                                                                                                                                                                                                                                                  |                                                |
| Vaccination                   | Vaccinated: BNT162b2 mRNA: two-dose schedule 21<br>d apart. mRNA-1273: two-dose schedule 28 d apart.<br>ChAdOx1 nCoV-19/AZD1222: two-dose schedule<br>56-84 d apart. Ad26.COV2.S: single dose. 14 d period<br>after second dose is required to considered patient<br>complete vaccinated. Not vaccinated: patient has not<br>received any vaccine dose or received an incomplete<br>schedule or after receiving the complete schedule<br>started with COVID-19 symptoms before 14 d apart<br>from de last dose |                                                |
| Chest X-ray at admis-<br>sion | No pneumonia, Unilateral pneumonia, Bilateral<br>pneumonia                                                                                                                                                                                                                                                                                                                                                                                                                                                     |                                                |
| First oxygen saturation       | First oxygen saturation in the emergency department<br>at admission (absolute value and categorical: less<br>than 94% Yes or not)                                                                                                                                                                                                                                                                                                                                                                              | %                                              |
| Worst oxygen satura-<br>tion  | Worst oxygen saturation throughout the admission<br>(absolute value and categorical: less than 94% Yes or<br>not)                                                                                                                                                                                                                                                                                                                                                                                              | %                                              |

|                        |                                                        |       |
|------------------------|--------------------------------------------------------|-------|
| O2 requirements:       |                                                        |       |
| None                   |                                                        |       |
| Low O2 flow            | Nasal cannula or ventiMask                             |       |
| High O2 flow           | Reservoir mask or high-flow nasal cannula              |       |
| Mechanical ventilation | intubation                                             |       |
| ICU admission          | Yes or not                                             |       |
| Death in hospital      | Yes or not, from any cause at 3 months after admission |       |
| Hospital stay          | From hospital admission to discharge                   | days  |
| ICU stay               | From ICU admission to discharge                        | Days  |
| CRP                    | Highest C-reactive protein blood value                 | mg/L  |
| IL-6 <sup>2</sup>      | Highest Interleukin 6 value                            | pg/ml |
| DD <sup>3</sup>        | Higesth D-dimer value                                  | ng/ml |
| Ferritin <sup>4</sup>  | Highest ferritin value                                 | ng/ml |
| Remdesivir             | Wether the patient received it or not                  |       |
| Steroids               | Wether the patient received it or not                  |       |
| Tocilizumab            | Wether the patient received it or not                  |       |
| Baricitinib            | Wether the patient received it or not                  |       |
| pLMWH                  | Wether the patient received it or not                  |       |

\* ICU: intensive care unit; VM: ventiMask; pLMWH: Low molecular weight heparin
